# Supplementary material for: Distinct plasma lipids profiles of recurrent ovarian cancer by liquid chromatography-mass spectrometry
Source: PubMed Central journal article supplement (PMC5564526; doi:10.18632/oncotarget.11603), 2016-08-25
Supplement: oncotarget-08-46834-s001.pdf [file oncotarget-08-46834-s001.pdf]

# Distinct plasma lipids profiles of recurrent ovarian cancer by liquid chromatography-mass spectrometry

## Supplementary Materials

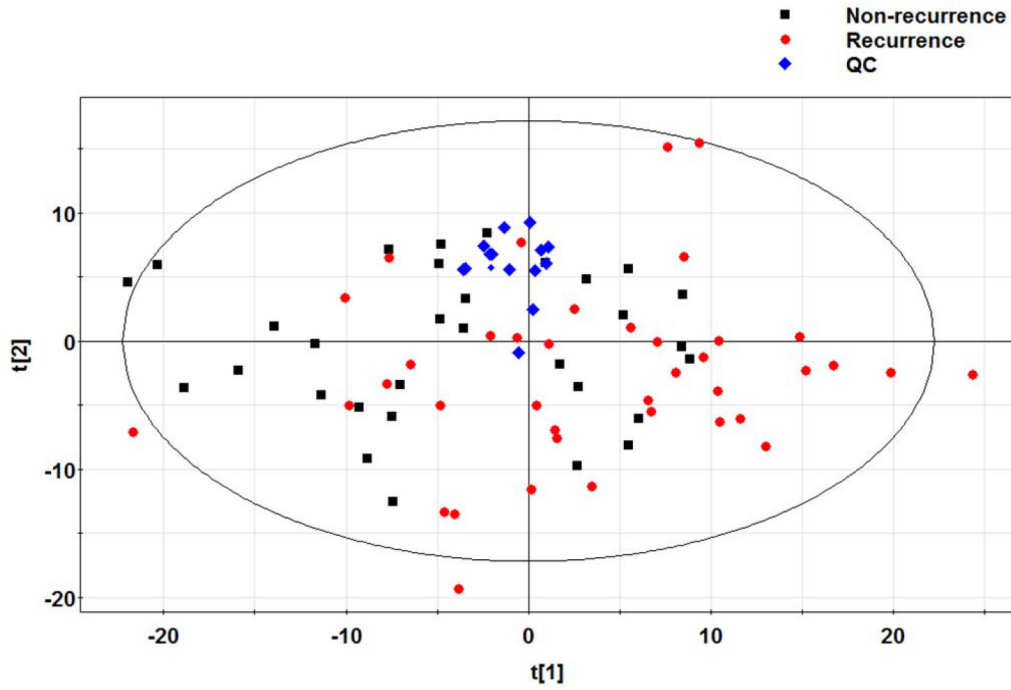

Supplementary Figure S1: PCA score plot for discriminating recurrent EOC, non-recurrent EOC and QC (quality control).

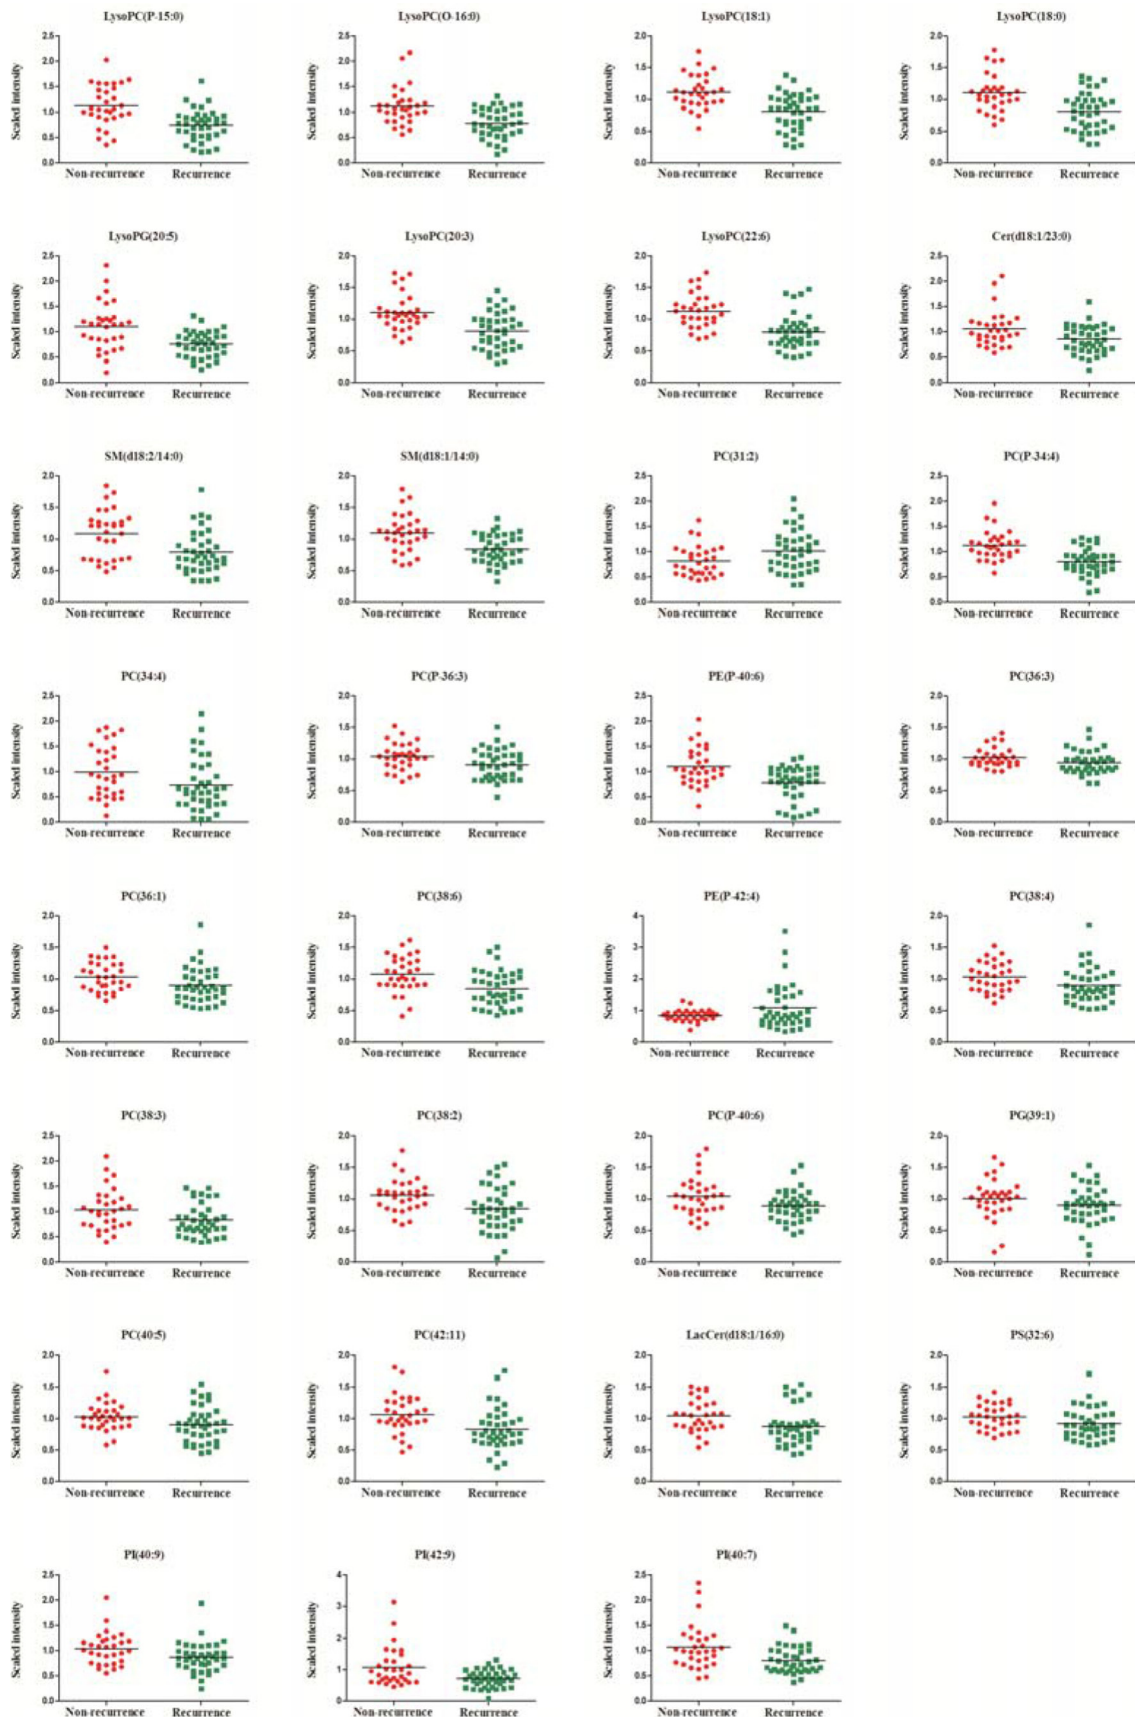

Supplementary Figure S2: Individual data for the concentrations of thirty-one lipids.

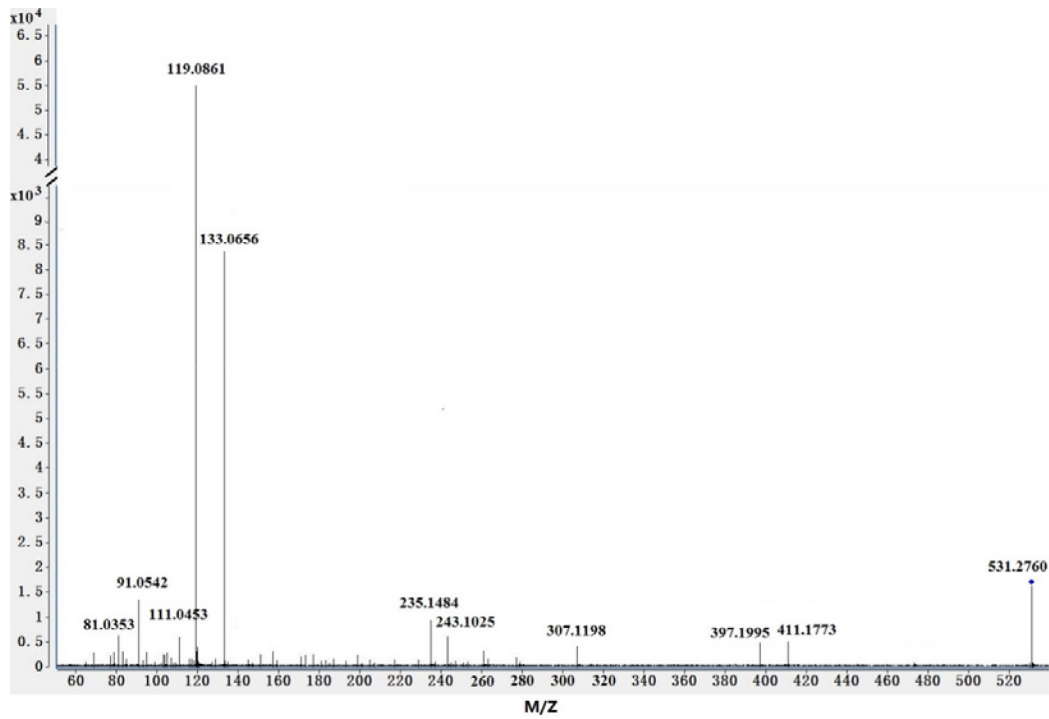

Supplementary Figure S3: Mass spectra for LysoPG (20:5).

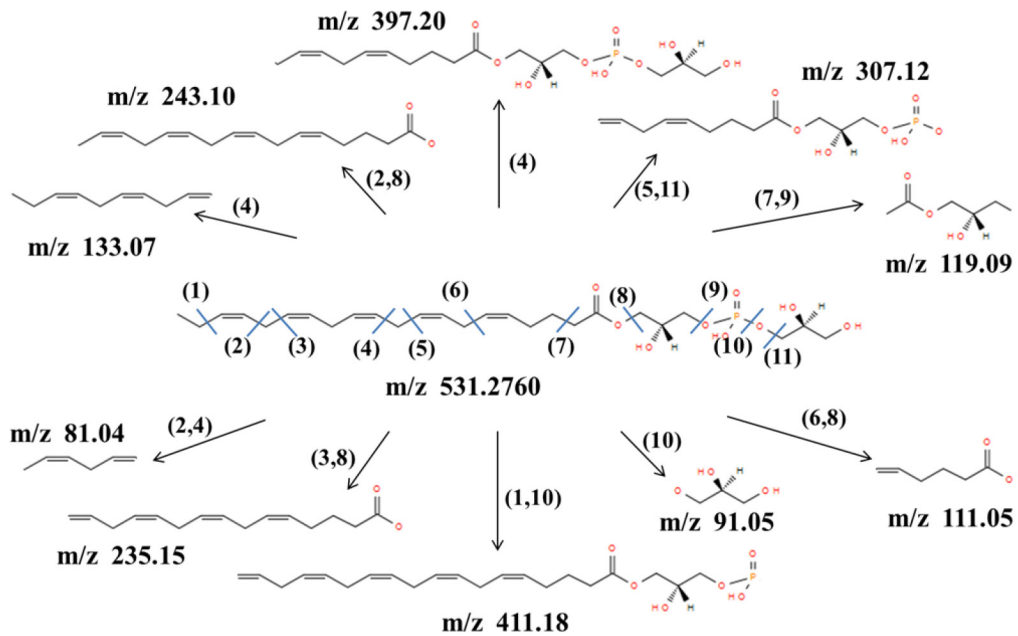

Supplementary Figure S4: The possible fragment structures of LysoPG(20:5).

**Supplementary Table S1: Univariate COX regression analysis for the association of PFS with demographic and clinical characteristics between recurrent and non-recurrent EOC patients**

| Parameter                  | Estimate | SE     | Chi-Square | P value | HR    | 95%CI |        |
|----------------------------|----------|--------|------------|---------|-------|-------|--------|
|                            |          |        |            |         |       | lower | Upper  |
| Age                        | 0.0084   | 0.0161 | 0.2700     | 0.6093  | 1.008 | 0.977 | 1.041  |
| CA125                      | 1.7049   | 1.0138 | 2.8279     | 0.0926  | 5.501 | 0.754 | 40.122 |
| greater omentum metastasis | 1.3345   | 0.4053 | 10.8391    | 0.0010  | 3.798 | 1.716 | 8.406  |
| FIGO stage                 | 0.9273   | 0.2915 | 10.1030    | 0.0015  | 2.528 | 1.427 | 4.478  |
| Histology differentiation  | 1.0023   | 0.3868 | 8.7159     | 0.0096  | 2.725 | 1.277 | 5.815  |
| Lymph node metastasis      | 1.0626   | 0.3398 | 9.7826     | 0.0018  | 2.894 | 1.487 | 5.632  |
| LysoGP(20:5)               | -2.0668  | 0.6036 | 11.7231    | 0.0006  | 0.127 | 0.039 | 0.413  |
